# Supplementary material
Source: publisher figshare collection journal article supplement (https://gsapubs.figshare.com/ndownloader/files/22740296)
Supplement: Supplementary file 1 [file 22740296]

Geological Society of America Supplementary Data # : Significant  
localities used in establishment of Mississippian facies boundaries (see  
Geological Society of America Bulletin, v. , p. , fig. 2.

1 - Mexican Spring, quartzose siltstone-facies belt; quartzose siltstone  
facies of the Perdido Formation overlies Tin Mountain Limestone (Klingman,  
1987).

2 - Western Lee Flat, quartzose siltstone-facies belt; quartzose siltstone  
facies of the Perdido Formation overlies 28+ m of limestone facies of the  
Perdido Formation containing sediment-gravity-flow deposits (Klingman, 1987).

3 - Talc City Hills, quartzose siltstone-facies belt; quartzose siltstone  
containing sediment-gravity-flow deposits overlies limestone facies of the  
Perdido Formation (Stone and others, 1989).

4 - Santa Rosa Hills, outer limestone-subfacies belt; Santa Rosa Hills  
Limestone containing many colonial corals overlies 456 m of limestone member of  
the Perdido Formation containing few sediment-gravity-flow deposits (Dunne and  
others, 1981).

5 - Eastern Darwin Hills, outer limestone-subfacies belt; Santa Rosa Hills  
Limestone overlies 410 m of limestone facies of the Perdido Formation containing  
few sediment-gravity-flow deposits (Moffitt, 1978).

6 - Eastern Argus Range, inner limestone-subfacies belt; Santa Rosa Hills  
Limestone overlies 105 m of limestone facies of Perdido Formation (Hall, 1971).

7 - Ubehebe Mine, quartzose siltstone-facies belt; quartzose siltstone  
facies of the Perdido Formation overlies 7 m of limestone facies of the Perdido  
Formation containing sediment-gravity-flow deposits (Klingman, 1987).

8 - Quartz Spring, quartzose siltstone-facies belt; quartzose siltstone  
facies of the Perdido Formation overlies 83 m of limestone facies of the Perdido  
Formation containing sediment-gravity-flow deposits (Klingman, 1987; McAllister,  
1952; Langenheim and Tischler, 1960).

9 - Dry Bone Canyon, outer limestone-subfacies belt: Santa Rosa Hills  
Limestone contains many colonial corals (Stevens and Stone, this study).

10 - Cottonwood Canyon, outer limestone-subfacies belt: Santa Rosa Hills  
Limestone overlies 417 m of limestone facies of Perdido Formation;  
Osagean-Meramecian boundary is above 280 m above base of the Perdido Formation  
(this study).

11 - Panamint Butte, inner limestone-subfacies belt: Santa Rosa Hills  
Limestone overlies 105 m of limestone facies of the Perdido Formation (Hall,  
1971).

12 - Bat Mountain, outer limestone-subfacies belt or quartzose  
siltstone-facies belt: top of section eroded. limestone facies of the Perdido  
Formation is 150+ m thick and contains several sediment-gravity-flow deposits  
(McAllister, 1976; McAllister, written commun., 1990; this study).  
Osagean-Meramecian boundary is below 71 m above base of the Perdido Formation  
(this study).

13 Mercury Ridge, quartzose siltstone-facies belt: faulted siltstone and  
black shale overlies 35+ m of thin-bedded limestone (Langenheim and Larson,  
1973; this study).

14 - Montgomery Mountains, outer limestone-subfacies belt: Bullion  
limestone overlies about 250 m of Anchor Limestone (Stevens and Stone, this  
study).

15 - Nopah Range, inner limestone-subfacies belt: Bullion Limestone  
overlies 150+ m of Anchor Limestone (Hazzard, 1937).

16 - Indian Springs, outer limestone-subfacies belt: Bullion Limestone  
containing many colonial corals overlies 255+ m of Anchor Limestone containing  
disturbed beds: Osagean-Meramecian boundary is 67-220 m above base of Anchor  
Limestone (Belasky, 1988)

17- Trough Spring, inner limestone-subfacies belt: Bullion Limestone  
overlies 169 m of Anchor Limestone: Osagean-Meramecian boundary is within the  
Yellowpine Limestone (Belasky, 1988).

18 - Southwest Sheep Range, quartzose siltstone-facies belt: siltstone overlies 10 m of Anchor(?) Limestone with sediment-gravity-flow deposits (Stone and Stevens, this study).

19 - Southeast Sheep Range, outer limestone-subfacies or quartzose siltstone-facies belt: top of section eroded: Anchor Limestone probably more than 200 m thick (Stone and Stevens, this study).

20 - La Madre Mountain, inner limestone-subfacies belt: Bullion Limestone overlies 100-150 m of Anchor Limestone (Axen, 1985).

21 - Mountain Springs Pass, inner limestone-subfacies belt: Bullion Limestone overlies 79 m of Anchor Limestone (Belasky, 1988).

22 - Potosi Mine, inner limestone-subfacies belt: Bullion Limestone overlies up to 20 m of Anchor Limestone (Hewett, 1931).

23 - Pahrangat Range, quartzose siltstone-facies belt: Needle Siltstone Member overlies a lower member of the Chainman Shale that lies above the Joana Limestone (Sandberg, oral commun., 1990).

24 - Kane Springs Wash, quartzose siltstone-facies belt: siltstone overlies thick-bedded Joana Limestone (Langenheim, 1963).

25 - Northern Meadow Valley Range, quartzose siltstone-facies belt (?): 25 m of calcareous siltstone with limestone of probable Meramecian age underlies the Battleship Wash Formation (Neder, 1973).

26 - Battleship Wash, outer limestone-subfacies(?) belt: Bullion Limestone overlies about 200 m of Anchor Limestone (Langenheim and others, 1962).

27 - Tungsten Gap, inner limestone-subfacies belt: Yellowpine Limestone containing numerous colonial corals overlies Bullion Limestone and 165 m of Anchor Limestone: Osagean-Meramecian boundary is in Yellowpine Limestone (Pierce and Langenheim, 1974; Poole and Sandberg, 1977; Belasky, 1988; Santogrossi, 1974).

28 - Eastern Las Vegas Range, outer limestone-subfacies belt: Yellowpine Limestone contains many colonial corals (Neder, 1973).

29 - Hidden Valley, outer limestone-subfacies belt: Bullion Limestone overlies 240 m of Anchor Limestone (Langenheim and others, 1962).

30 - Frenchman Mountain, inner limestone-subfacies belt: Bullion Limestone overlies 26 m of Anchor Limestone (Langenheim and Webster, 1979).

31 - Muddy Mountains, inner limestone-subfacies belt, Bullion Limestone overlies 75 m of Anchor Limestone (Langenheim, 1963).

32 - Mormon Mountains, inner limestone-subfacies belt: Bullion Limestone overlies 42 m of Anchor Limestone (Langenheim, 1963).

REFERENCES CITED

5a

Axen, G.J., 1985, Geologic map and description of structure and stratigraphy, La Madre Mountain, Spring Mountains, Nevada: Geological Society of America Map and Chart Series MC-51, scale 1:25,000, 17 p.

Belasky, Paul, 1988, Stratigraphy and paleogeographic setting of the Mississippian Monte Cristo Group in the Spring Mountains, Nevada (M.S. thesis): San Jose State University, San Jose, California, 152 p.

Dunne, G.C., Gulliver, R.M., and Stevens, C.H., 1981, Correlation of Mississippian shelf-to-basin strata, eastern California: Geological Society of America Bulletin, pt. II, v. 92, p. 1-38.

Hall, W.E., 1971, Geology of the Panamint Butte quadrangle, Inyo County, California: U.S. Geological Survey Bulletin 1299, 67 p.

Hazzard, J.C., 1937, Paleozoic section in the Nopah and Resting Springs Mountains, Inyo County, California: California Journal of Mines and Geology, v. 37, no. 4, p. 273-339.

Hewett, D.F., 1931, Geology and ore deposits of the Goodsprings quadrangle, Nevada: U.S. Geological Survey Professional Paper 162, 172 p.

Klingman, D.S., 1987, Depositional environments and paleogeographic setting of the middle Mississippian section in eastern California (M.S. thesis): San Jose State University, San Jose, California, 231 p.

Langenheim, R.L., Jr., 1963, Mississippian stratigraphy in southwestern Utah and adjacent parts of Nevada and Arizona: Intermountain Association of Petroleum Geologists 12th Annual Field Conference, p. 30-41.

Langenheim, R.L., Jr., Carss, B.W., Kennerly, J.B., McCutcheon, V.A., and Waines, R.H., 1962, Paleozoic section in Arrow Canyon Range, Clark County, Nevada: American Association of Petroleum Geologists Bulletin, v. 46, p. 592-609.

Langenheim, R.L., Jr., and Larson, E.R., Co-chairman, 1973, Correlation of Great Basin stratigraphic units: Nevada Bureau of Mines and Geology, Bulletin 72, 36 p., 3 charts.

Langenheim, R.L., Jr., and Tischler, H., 1960, Mississippian and Devonian paleontology and stratigraphy, Quartz Spring area, Inyo County, California: University of California Publications in Geological Science, v. 38, p. 89-152.

Langenheim, R.L., Jr., and Webster, G.D., 1979, Stop descriptions - sixth day, in Beus, S.S., and Rawson, R.R., eds., Carboniferous stratigraphy in the Grand Canyon country, northern Arizona and southern Nevada; Field trip no. 13, ninth Congress on Carboniferous Stratigraphy and Geology; American Geologic Institute Selected Guidebook Series No. 2., p. 53-60.

McAllister, J.F., 1952, Rocks and structure of the Quartz Spring area, northern Panamint Range, California: California Division of Mines and Geology Special Report 25, 38 p.

\_\_\_\_\_, 1976, Geologic maps and sections of a strip from Pyramid Peak to the southeast end of the Funeral Mountains, Ryan quadrangle, California, in Troxel, B.W., and Wright, L.A., eds., Geologic features, Death Valley, California: California Division of Mines and Geology Special Report 106, p. 63-65.

Moffitt, Jay, 1978, Depositional history of Late Paleozoic rocks in the southeastern Darwin Hills (M.S. thesis): San Jose State University, San Jose, California, 66 p.

Neder, I.R., 1973, Conodont biostratigraphy and depositional history of the Mississippian Battleship Wash Formation, southern Nevada (Ph.D. thesis): Los Angeles, University of California, 173 p.

Pierce, R.W., and Langenheim, R.L., Jr., 1974, Platform conodonts of the Monte Cristo Group, Mississippian, Arrow Canyon Range, Clark County, Nevada: *Journal of Paleontology*, v. 48, p. 149-170.

Poole, F.G., and Sandberg, C.A., 1977, Mississippian paleogeography and tectonics of the western United States. in Stewart, J.H., Stevens, C.H., and Fritsche, A.E., eds., *Paleozoic paleogeography of the western United States, Pacific Coast Paleogeography Symposium 1: Pacific Section of Society of Economic Paleontologists and Mineralogists*, p. 67-85.

Santogrossi, P.A., 1974, Environmental analysis of a lithostrotionid biostrome, Yellowpine Limestone, Arrow Canyon Range, Clark County, Nevada (M.S. thesis): Urbana, Illinois, University of Illinois, 75 p.

Stone, Paul, Dunne, G.C., Stevens, C.H., and Gulliver, R.M., 1989, Geologic map of Paleozoic and Mesozoic rocks in parts of the Darwin and adjacent quadrangles, Inyo County, California : U.S. Geological Survey Map 1-1932, scale 1-31,250.
